# Supplementary material
Source: PubMed Central journal article supplement (PMC11629344)
Supplement: sj-pdf-1-jcb-10.1177_0271678X241304924.pdf [file sj-pdf-1-jcb-10.1177_0271678X241304924.pdf]

**Supplementary Information**

**Supplementary Table S1.** Regional distribution volume ( $V_T$ ) of [<sup>18</sup>F]SF51 in human brain.

| Region                  | HAB (n=2) |      | MAB (n=3) |      | LAB (n=2) |      | HAB/MAB | HAB/LAB | MAB/LAB |
|-------------------------|-----------|------|-----------|------|-----------|------|---------|---------|---------|
|                         | Mean      | COV  | Mean      | COV  | Mean      | COV  |         |         |         |
| Whole Brain             | 0.64      | 0.05 | 0.94      | 0.04 | 0.40      | 0.15 | 0.69    | 1.62    | 2.36    |
| Frontal Cortex          | 0.63      | 0.01 | 0.92      | 0.10 | 0.40      | 0.17 | 0.68    | 1.56    | 2.30    |
| Cingulate Cortex        | 0.65      | 0.02 | 0.96      | 0.06 | 0.41      | 0.20 | 0.67    | 1.57    | 2.33    |
| Hippocampus             | 0.74      | 0.03 | 1.05      | 0.03 | 0.47      | 0.05 | 0.70    | 1.58    | 2.25    |
| Amygdala                | 0.69      | 0.06 | 1.05      | 0.02 | 0.42      | 0.05 | 0.65    | 1.64    | 2.50    |
| Temporal Cortex         | 0.62      | 0.02 | 0.90      | 0.04 | 0.39      | 0.14 | 0.69    | 1.58    | 2.29    |
| Parietal Cortex         | 0.61      | 0.04 | 0.88      | 0.06 | 0.36      | 0.21 | 0.69    | 1.66    | 2.40    |
| Occipital Cortex        | 0.69      | 0.04 | 0.93      | 0.03 | 0.39      | 0.12 | 0.74    | 1.76    | 2.39    |
| Striatum                | 0.59      | 0.10 | 0.93      | 0.05 | 0.40      | 0.21 | 0.63    | 1.48    | 2.35    |
| Thalamus                | 0.77      | 0.04 | 1.11      | 0.05 | 0.46      | 0.15 | 0.69    | 1.66    | 2.39    |
| Corpus callosum         | 0.63      | 0.05 | 0.96      | 0.03 | 0.43      | 0.18 | 0.66    | 1.45    | 2.20    |
| Insula                  | 0.64      | 0.02 | 0.98      | 0.05 | 0.41      | 0.16 | 0.66    | 1.55    | 2.37    |
| Brain stem              | 0.82      | 0.14 | 1.21      | 0.06 | 0.48      | 0.07 | 0.68    | 1.71    | 2.53    |
| White matter            | 0.65      | 0.07 | 0.98      | 0.06 | 0.43      | 0.16 | 0.67    | 1.52    | 2.27    |
| Cerebellum grey matter  | 0.66      | 0.12 | 0.94      | 0.02 | 0.41      | 0.07 | 0.70    | 1.63    | 2.31    |
| Cerebellum White matter | 0.74      | 0.14 | 1.04      | 0.01 | 0.46      | 0.08 | 0.71    | 1.62    | 2.27    |

COV: coefficient of variation; HAB: high-affinity binder; MAB: mixed-affinity binder; LAB: low-affinity binder.

**Supplementary Table S2.** Time-integrated activity coefficients of source organs determined from whole-body imaging of two healthy volunteers injected with [<sup>18</sup>F]SF51.

| Organ             | Time (hours)    |
|-------------------|-----------------|
| Brain             | 0.0133 ± 0.0016 |
| Heart             | 0.0101 ± 0.0042 |
| Liver             | 0.0410 ± 0.0208 |
| Kidneys           | 0.0133 ± 0.0058 |
| Lungs             | 0.0274 ± 0.0191 |
| Stomach           | 0.0055 ± 0.0006 |
| Spleen            | 0.0038 ± 0.0015 |
| Red Marrow        | 0.0206 ± 0.0013 |
| Gall Bladder      | 0.0020 ± 0.0022 |
| Intestine         | 0.0364 ± 0.0058 |
| Urinary Bladder   | 0.0088 ± 0.0028 |
| Remainder of body | 0.7662 ± 0.0780 |

Data are presented as mean ± SD.

**Supplementary Table S3.** Radiation dosimetry estimates for [<sup>18</sup>F]SF51 were determined from two healthy volunteers.

| Organ                      | Radiation dose (μSV/MBq) |
|----------------------------|--------------------------|
| Adrenals                   | 15.2 ± 2.2               |
| Brain                      | 5.4 ± 0.6                |
| Breasts                    | 11.3 ± 1.9               |
| Gallbladder Wall           | 18.1 ± 2.8               |
| Lower Large Intestine Wall | 16.5 ± 3.0               |
| Small Intestine            | 22.8 ± 3.6               |
| Stomach Wall               | 16.4 ± 2.7               |
| Upper Large Intestine Wall | 16.8 ± 2.9               |
| Heart Wall                 | 15.8 ± 1.5               |
| Kidneys                    | 16.8 ± 0.6               |
| Liver                      | 10.1 ± 2.9               |
| Lungs                      | 11.9 ± 1.8               |
| Muscle                     | 13.4 ± 2.2               |
| Ovaries                    | 14.7 ± 0.4               |
| Pancreas                   | 16.0 ± 2.4               |
| Red Marrow                 | 13.7 ± 1.9               |
| Osteogenic Cells           | 22.2 ± 4.5               |
| Skin                       | 10.6 ± 1.8               |
| Spleen                     | 12.3 ± 3.3               |
| Thymus                     | 13.9 ± 2.7               |
| Thyroid                    | 13.6 ± 1.6               |
| Urinary Bladder Wall*      | 16.6 ± 6.1               |
| Uterus                     | 17.6 ± 1.8               |
| Total Body                 | 15.0 ± 0.1               |
| Effective Dose             | 13.8 ± 0.9               |

\*Dynamic urinary bladder model was not used; data are presented as mean ± SD.

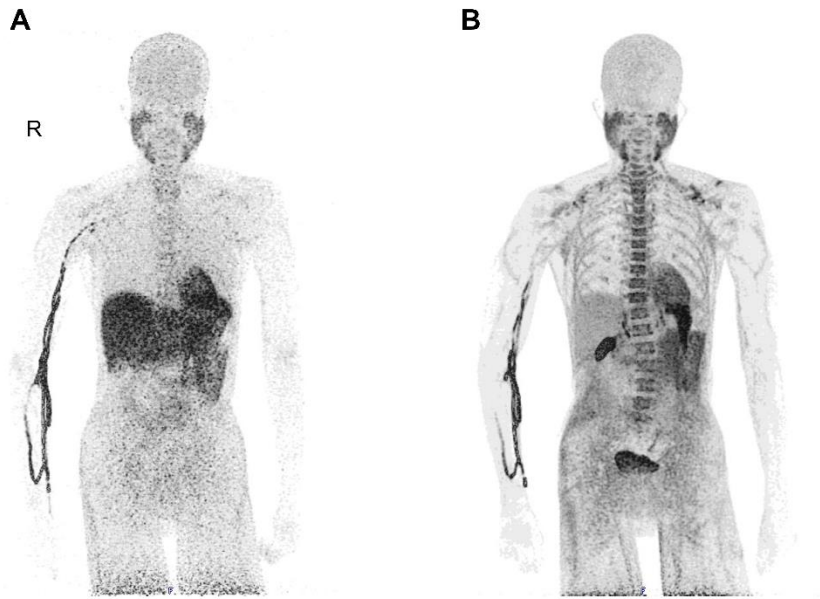

**Supplementary Figure S1** Whole-body images of a healthy female at 10 minutes (**A**) and 90 minutes (**B**) after [ $^{18}\text{F}$ ]SF51 injection. The images are displayed in standardized uptake value (SUV) as a two-dimensional compression with maximal intensity projected (MIP) forward to emphasize contrast at the edge of organs. The images are decay-corrected to time of injection.

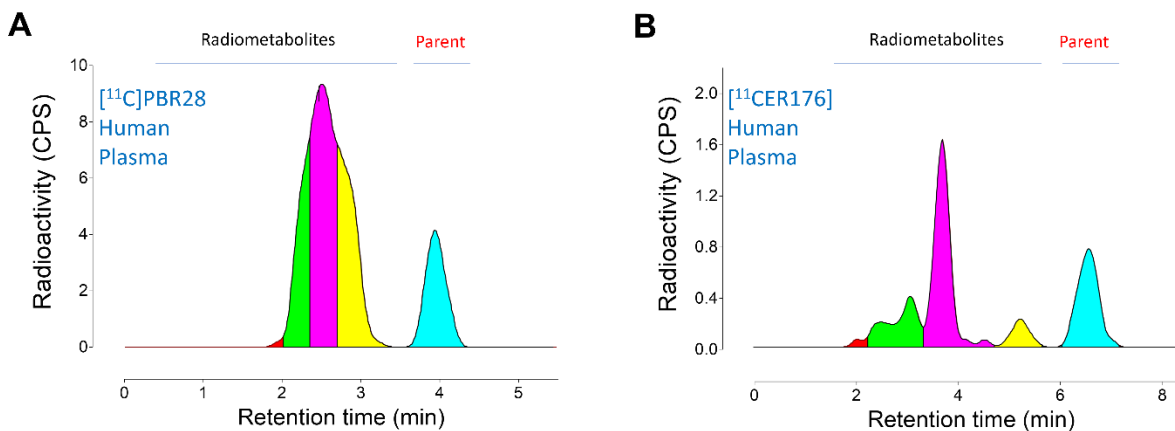

**Supplemental Figure S2.** Representative human arterial plasma radiochromatograms for [<sup>11</sup>C]PBR28 and [<sup>11</sup>C]ER176 at 90 minutes after radioligand administration. No radioactivity was detected eluting after the parent peak.
